# Supplementary material for: Ultrahigh strength and ductility in newly developed materials with coherent nanolamellar architectures
Source: Springer Nature journal article supplement (doi:10.1038/s41467-020-20109-z), 2020-12-07
Supplement: 41467_2020_20109_MOESM1_ESM.pdf [file 41467_2020_20109_MOESM1_ESM.pdf]

1 **Supplementary information for**

2

3 **Ultrahigh strength and ductility in newly developed materials with coherent**

4 **nano-lamellar architectures**

5 Lei Fan<sup>1</sup>, Tao Yang<sup>2</sup>, Yilu Zhao<sup>2</sup>, Junhua Luan<sup>2</sup>, Gang Zhou<sup>3</sup>, Hao Wang<sup>3</sup>, Zengbao Jiao<sup>1,\*</sup> &

6 Chain-Tsuan Liu<sup>2,\*</sup>

7 <sup>1</sup> *Department of Mechanical Engineering, The Hong Kong Polytechnic University, Hong Kong, China*

8 <sup>2</sup> *Department of Materials Science and Engineering, City University of Hong Kong, Hong Kong, China*

9 <sup>3</sup> *Shi-changxu Innovation Center for Advanced Materials, Institute of Metal Research, Chinese Academy*

10 *of Sciences, Shenyang 110016, China*

11 *\* Corresponding authors: zb.jiao@polyu.edu.hk; chainliu@cityu.edu.hk*

12

13 **This file includes:**

14 **Supplementary Figures 1-11**

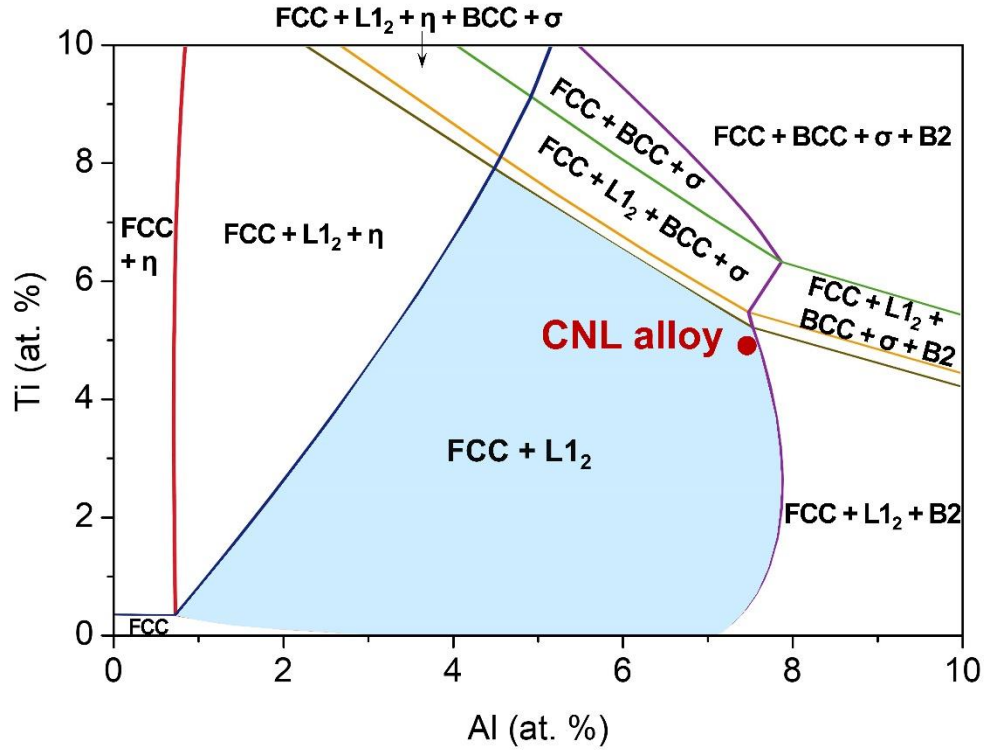

15

16 **Supplementary Fig. 1** Thermodynamic calculations of the isothermal section of  
 17 **(Ni<sub>1.5</sub>CoFeCr<sub>0.5</sub>)<sub>100-x-y</sub>Al<sub>x</sub>Ti<sub>y</sub> (at.%) at 600 °C. The Ni-Co-Fe-Cr-Al-Ti system has a large dual-  
 18 phase region consisting of disordered-FCC and ordered-L<sub>12</sub> phases with a small lattice mismatch,  
 19 satisfying the requirement for the formation of coherent boundaries. The red spot indicates the  
 20 position of the CNL alloy (Ni<sub>32.8</sub>Fe<sub>21.9</sub>Co<sub>21.9</sub>Cr<sub>10.9</sub>Al<sub>7.5</sub>Ti<sub>5.0</sub>).**

21

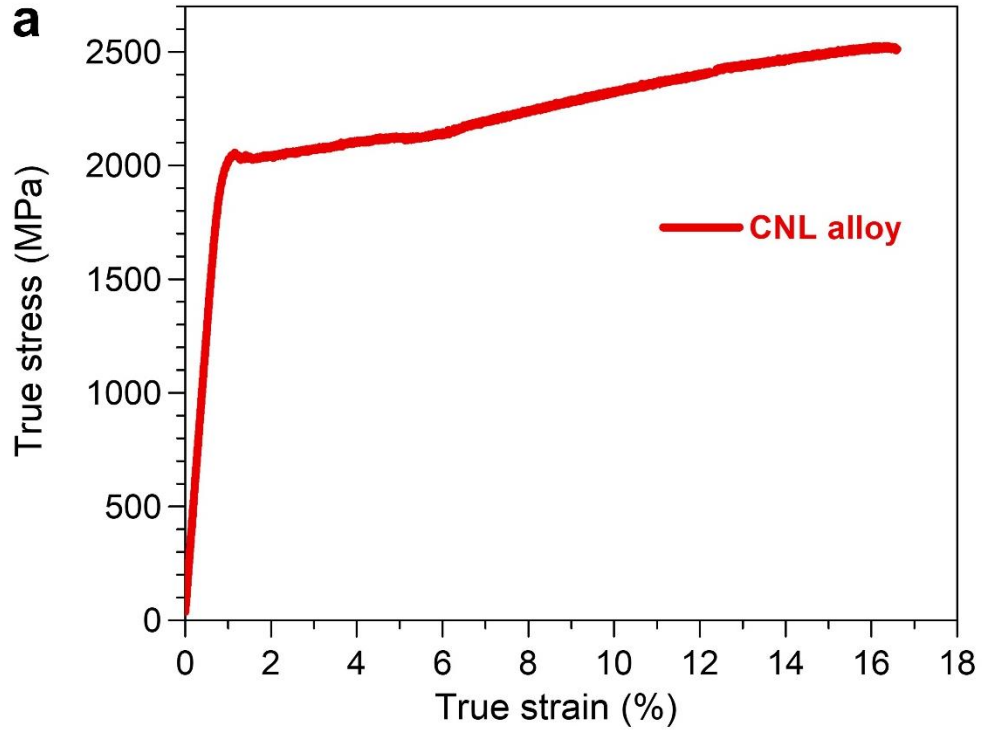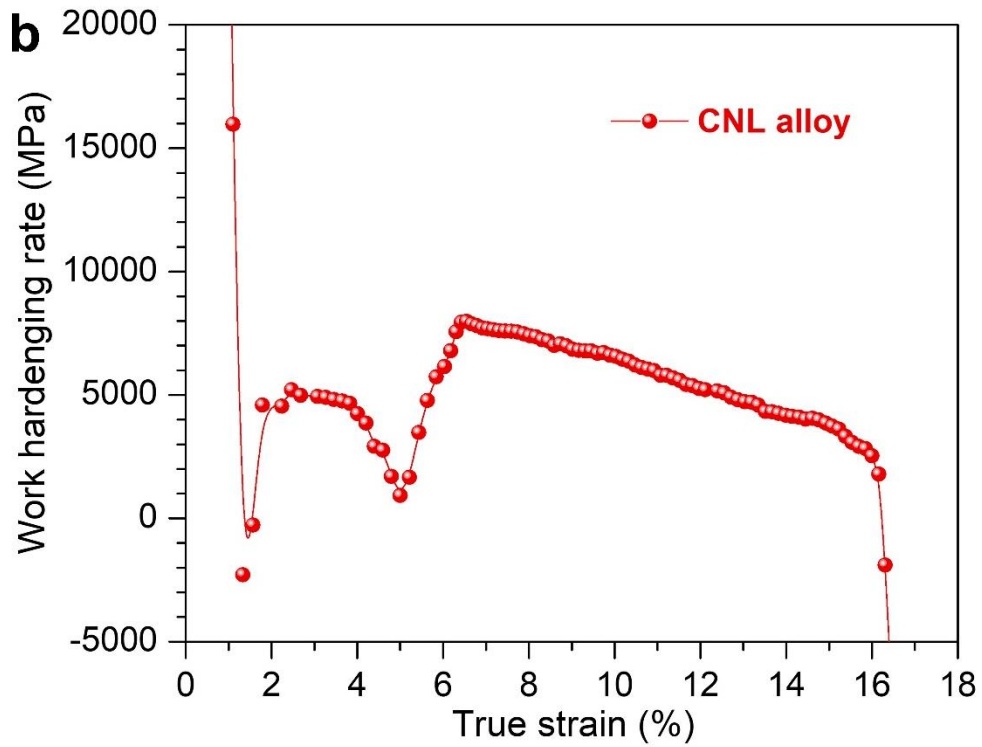

22

23 **Supplementary Fig. 2 Tensile behavior of the CNL alloy. a** True stress-strain curve. **b** Work  
24 hardening rate as a function of true strain.

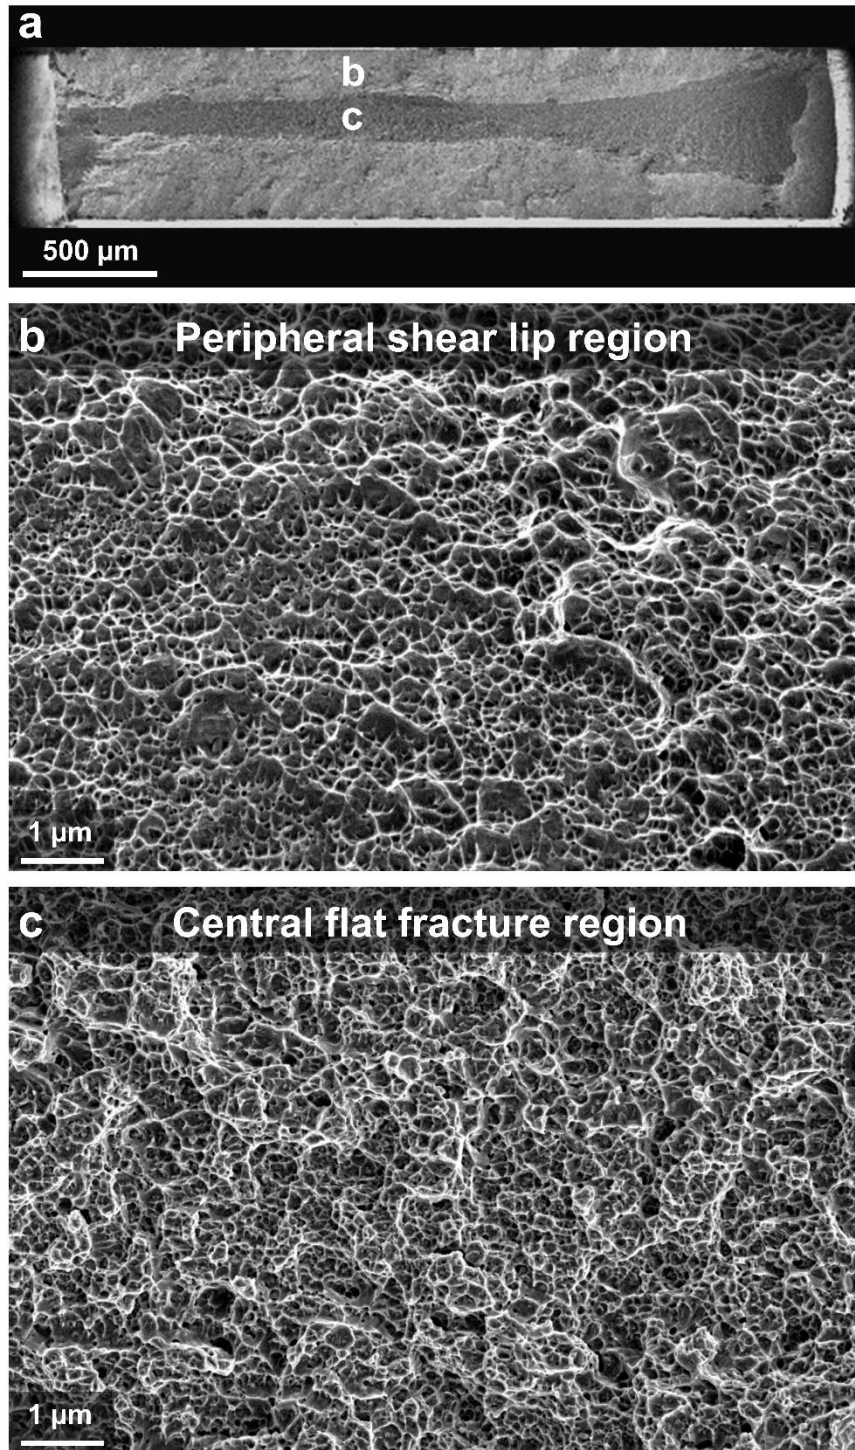

25

26 **Supplementary Fig. 3 Fracture surfaces of the CNL alloy.** **a** Overview of the fracture surface.  
27 **b** High magnification of the peripheral shear lip region. **c** High magnification of the central flat  
28 fracture region. Both regions show a plenty of fine dimples, indicating a characteristic mode of a  
29 ductile fracture.

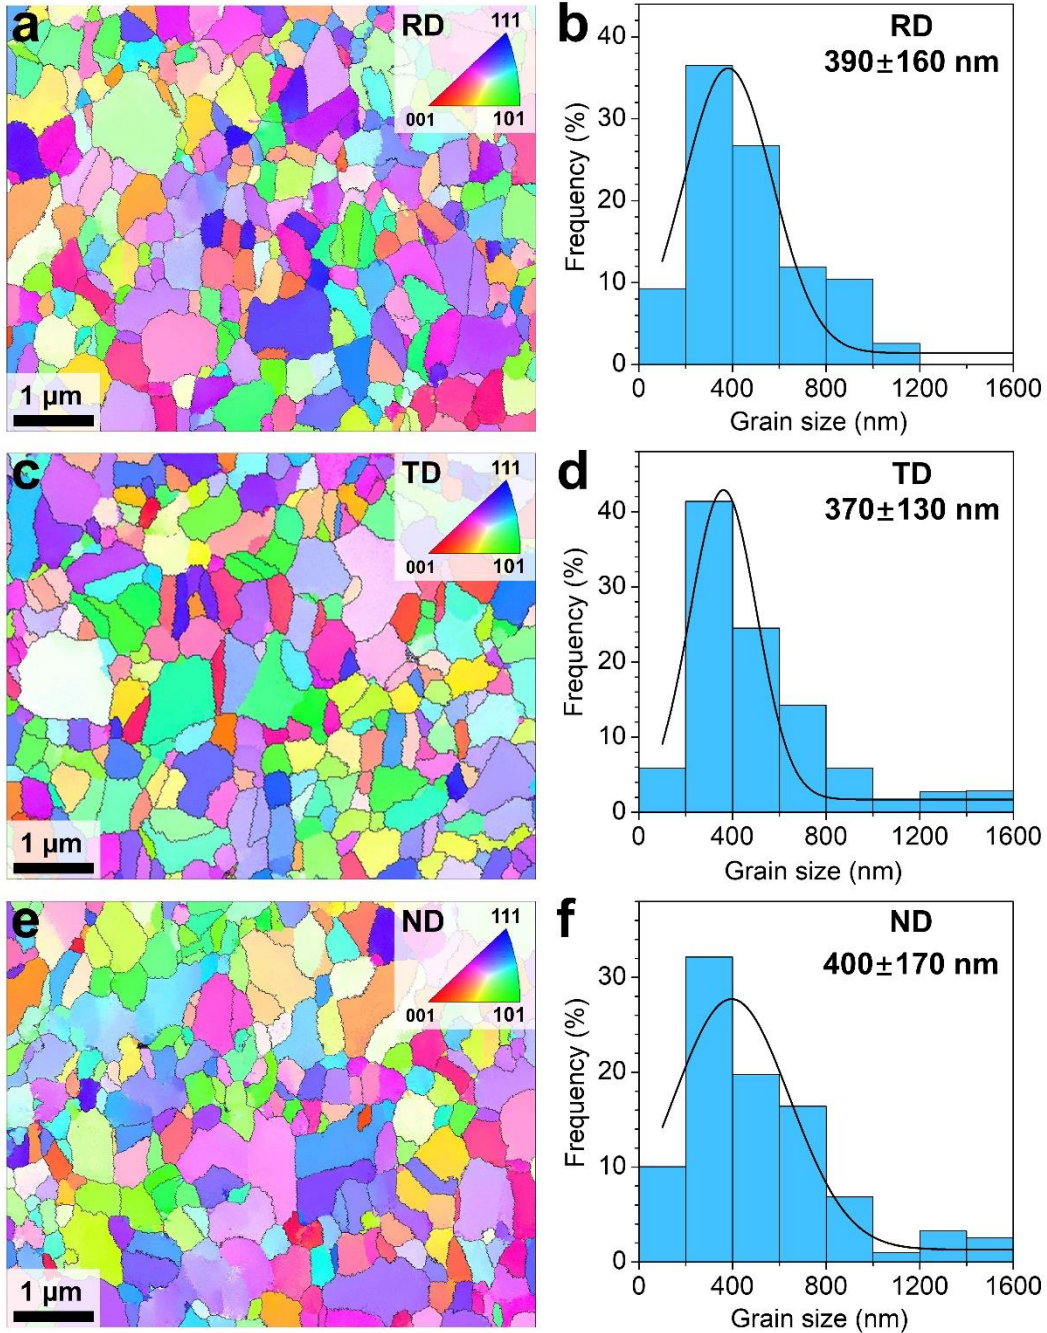

30

31 **Supplementary Fig. 4 EBSD images and grain size distributions of the CNL alloy along the**  
 32 **different directions. a, b** Rolling direction (RD). **c, d** Transverse direction (TD). **e, f** Normal  
 33 direction (ND). The CNL alloy exhibits a uniform distribution of equiaxed ultrafine grains with an  
 34 average size of ~390 nm and random orientations.

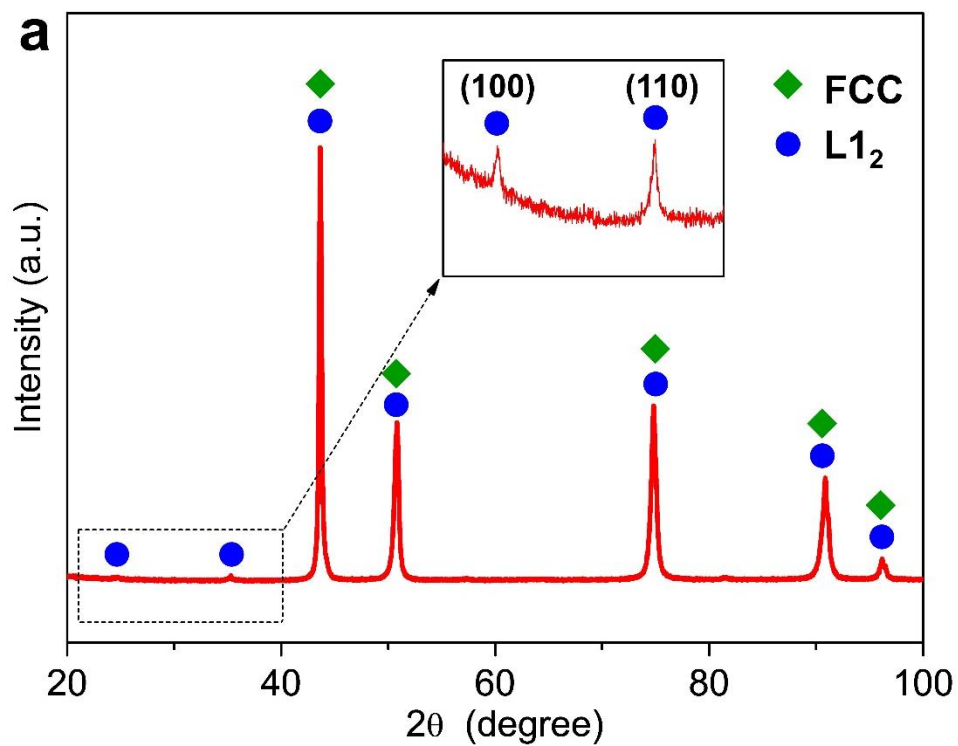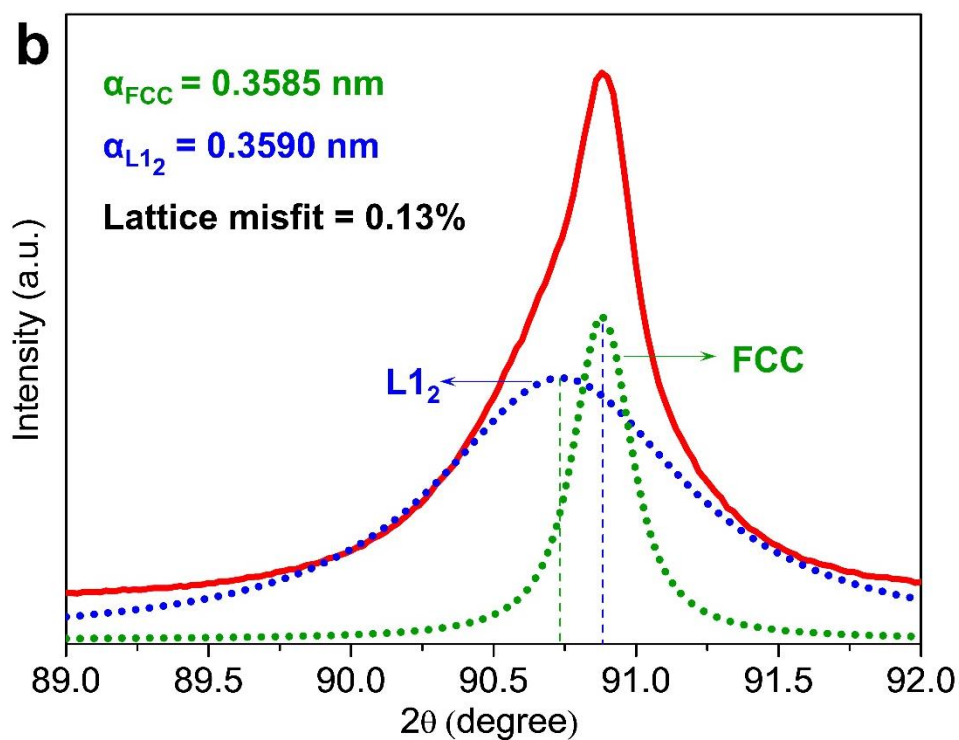

35  
 36 **Supplementary Fig. 5 XRD patterns of the CNL alloy. a** The diffraction pattern showing the  
 37 co-existence of FCC and  $L_{12}$  phases. **b** Deconvolution of the (311) diffraction peak for determining  
 38 the lattice parameter of the FCC and  $L_{12}$  phases.



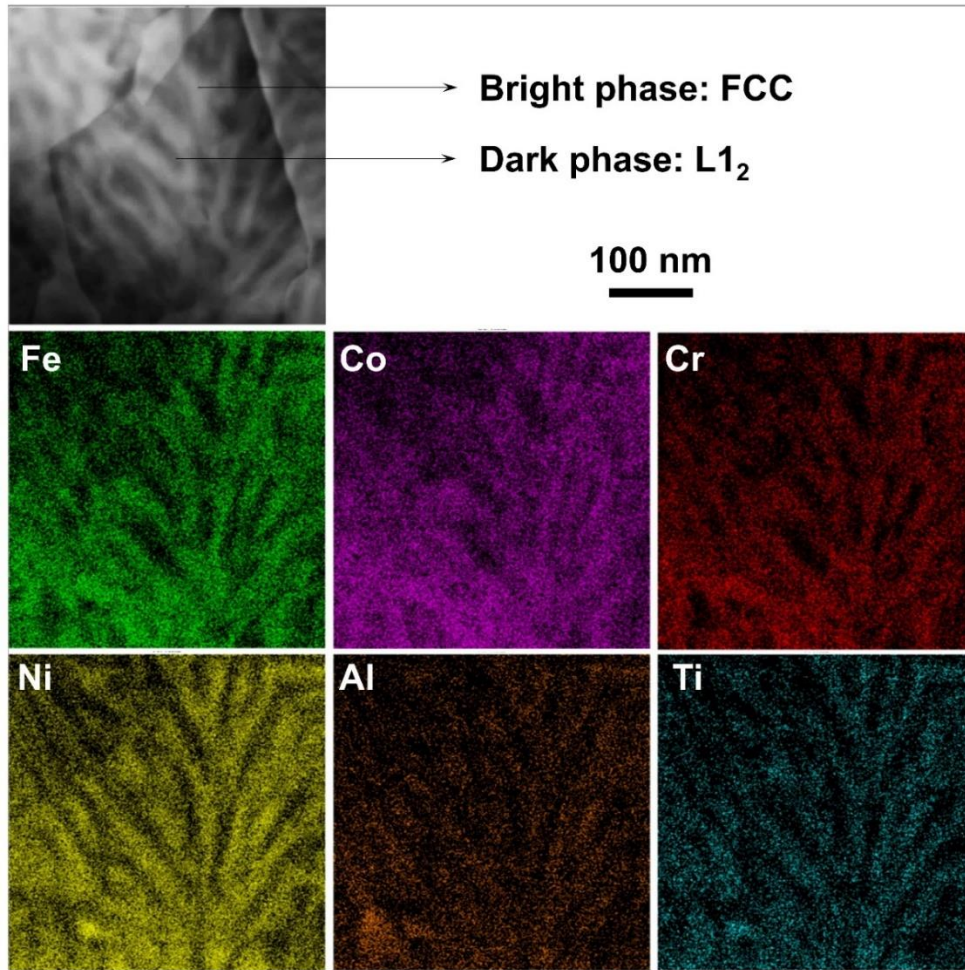

39

40 **Supplementary Fig. 6 STEM-EDS mappings of the CNL alloy.** The elemental maps illustrate  
41 that Fe, Co, and Cr partition to the FCC phase and Ni, Al, and Ti partition to the L1<sub>2</sub> phase, which  
42 is inconsistent with the APT characterization.

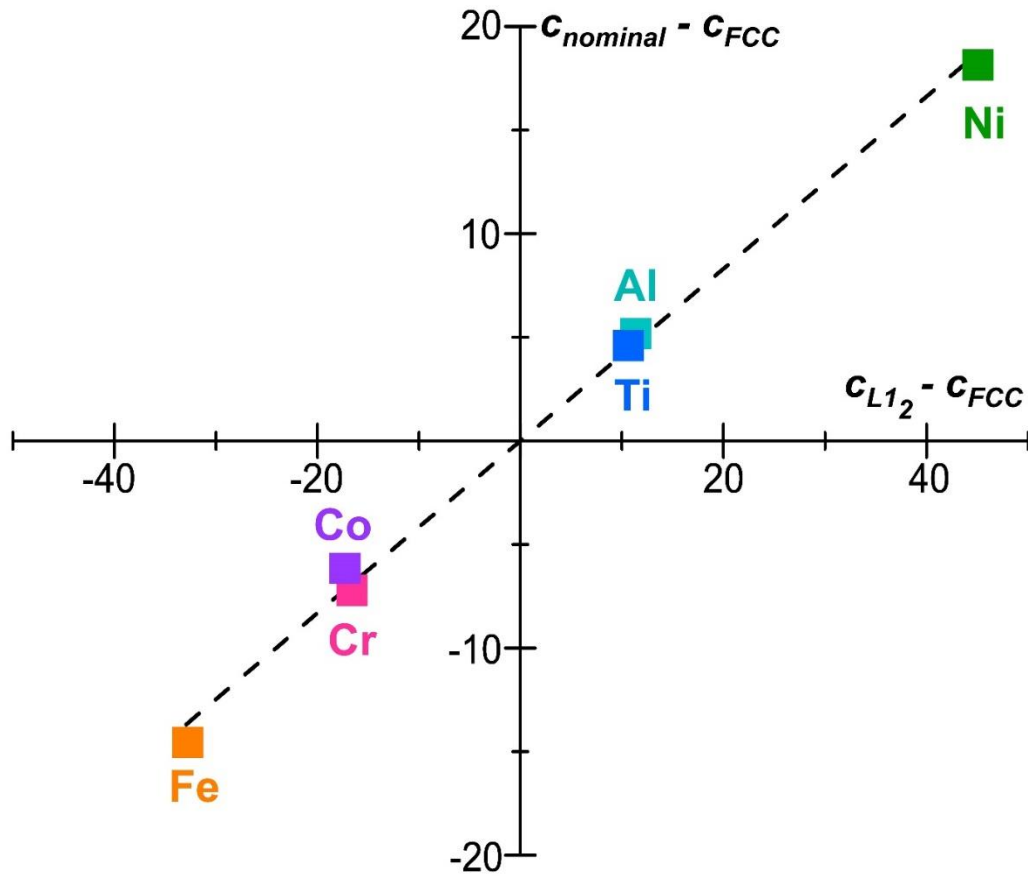

43

44 **Supplementary Fig. 7 Determination of phase volume fractions of the CNL alloy by using**  
 45 **the lever rule.** The APT concentrations of Fe, Co, Cr, Ni, Al, and Ti were used in the analysis.  
 46 The volume fraction of the FCC and  $L1_2$  phases were estimated to be approximately 56% and 44%,  
 47 respectively.

48



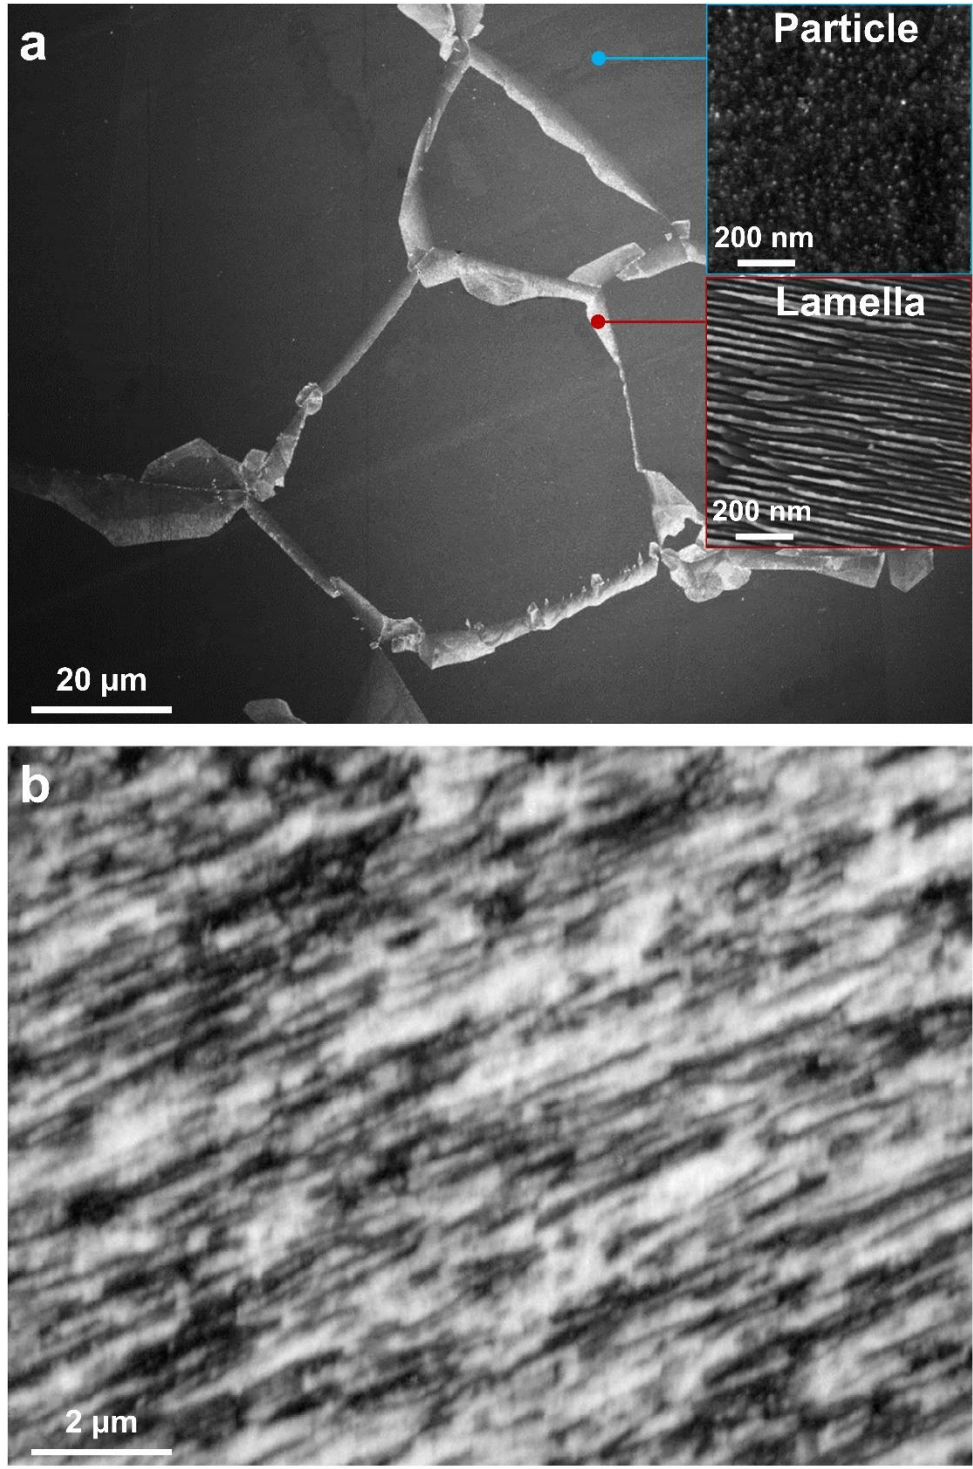

49

50 **Supplementary Fig. 8 Microstructures of the reference alloys. a** Conventionally processed  
51 alloy. **b** Severely deformed alloy.

52

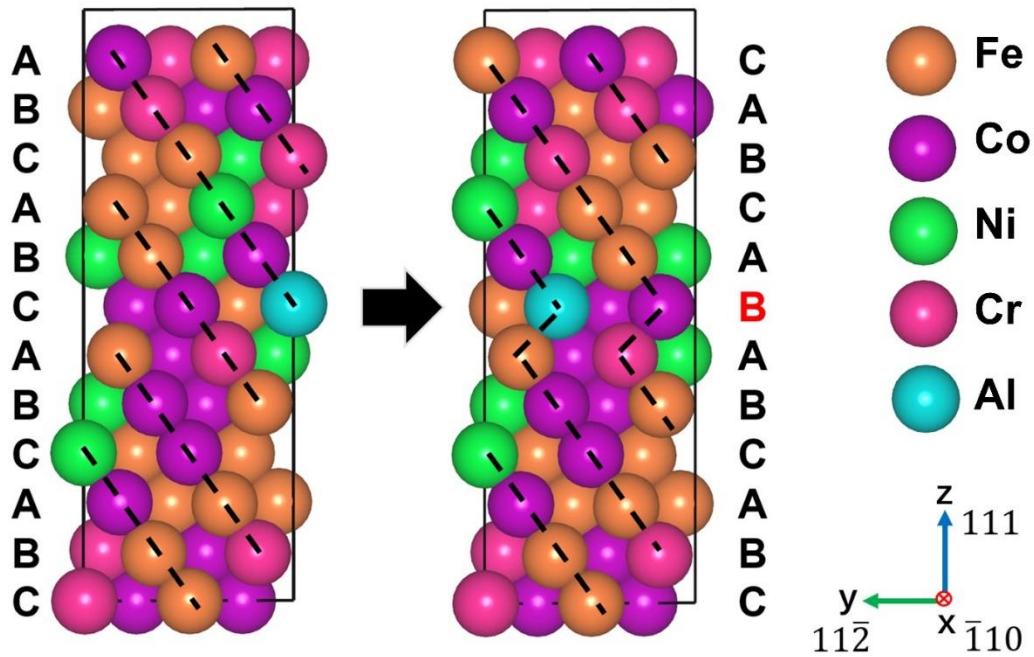

53

54 **Supplementary Fig. 9 Atomic configurations of the original FCC structure and defective**  
 55 **structure with intrinsic stacking faults.** The FCC supercell has 12 different atomic layers in the  
 56 direction perpendicular to the stacking fault plane, and 12 derivative supercells containing different  
 57 SF planes were built by moving each layer. Descriptions for the determination of SF energy by ab  
 58 initio calculations are summarized in Methods.

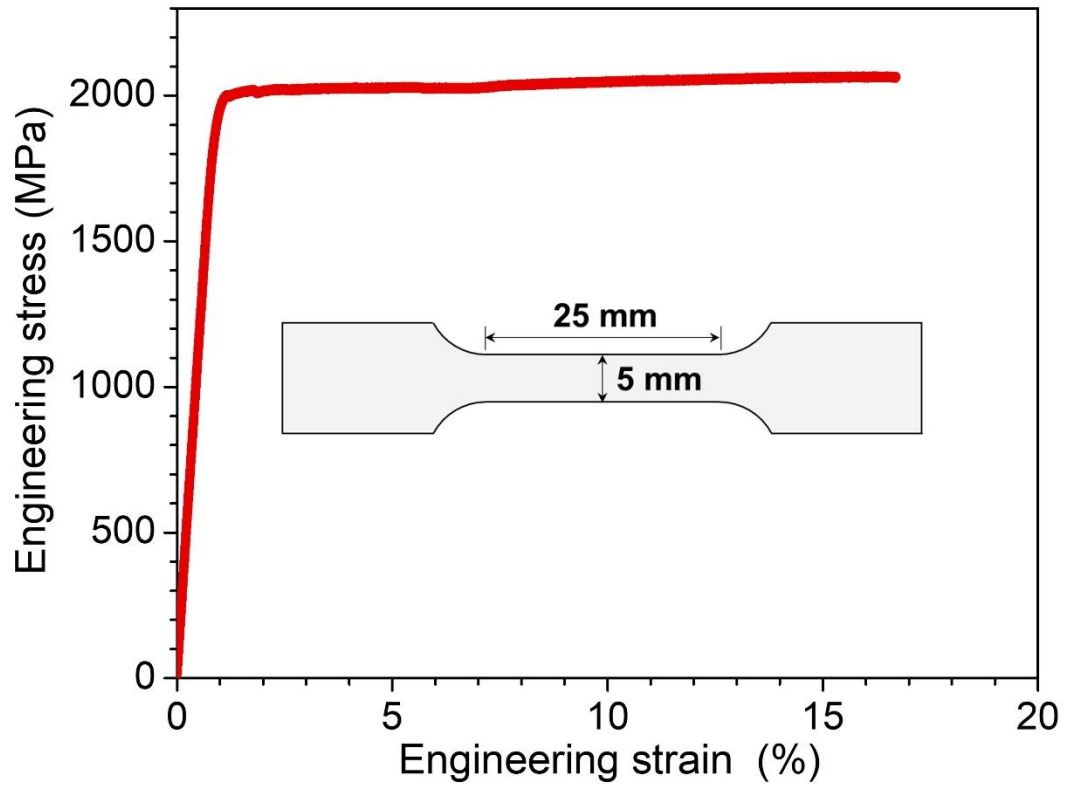

59

60 **Supplementary Fig. 10 Tensile engineering stress-strain curve of the CNL sample with a**  
61 **gauge length of 25 mm and a gauge width of 5 mm.** The mechanical properties of the large-  
62 sized samples are highly comparable to our initial results.

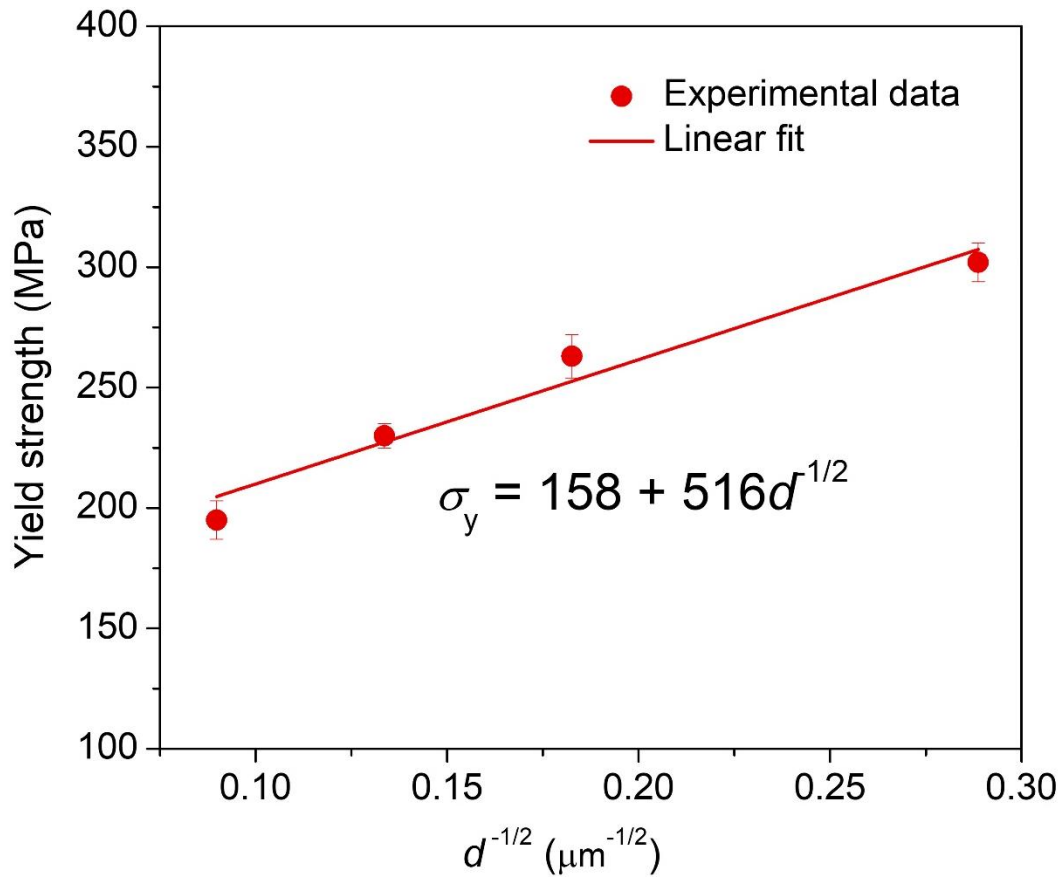

63

64 **Supplementary Fig. 11 Plot of the yield strength as a function of the inverse square root of**  
 65 **mean grain size of the alloy having the composition of the FCC matrix in the CNL alloy.**
